# Supplementary material
Source: Springer Nature journal article supplement (https://www.springermedizin.de/resource/supplementary/12884_2011_425_MOESM1_ESM.pdf/9457676)
Supplement: MOESM1 [file 9457676]

Abstracts from computer search, hand search and secondary reference search (n=153)

Articles excluded in the initial screening for not meeting the inclusion criteria (n=73)

Articles retrieved for detailed evaluation (n=80)

Articles excluded from the systematic review, but used in literature review (n=20)

Articles excluded from background literature (n=48)

Articles meeting eligibility for inclusion in the systematic review (n=12)
